# Supplementary material for: Single-Cell Discovery and Multiomic Characterization of Therapeutic Targets in Multiple Myeloma
Source: PubMed Central journal article supplement — Cancer Res. 2023 Feb 13;83(8):1214–33. doi: 10.1158/0008-5472.CAN-22-1769 (PMC10102848; doi:10.1158/0008-5472.can-22-1769), 2023-02-13
Supplement: can-22-1769_supplementary_figures_suppsf1-sf7.pdf [file can-22-1769_supplementary_figures_suppsf1-sf7.pdf]

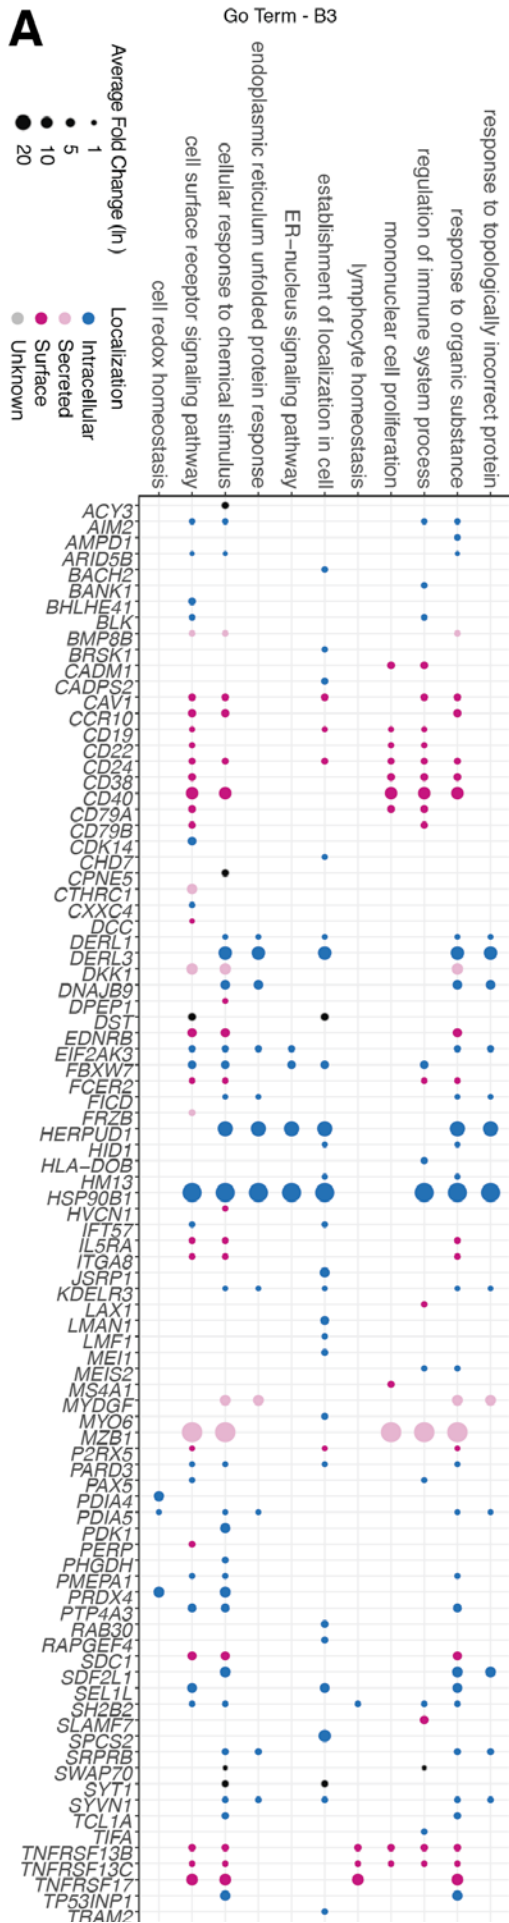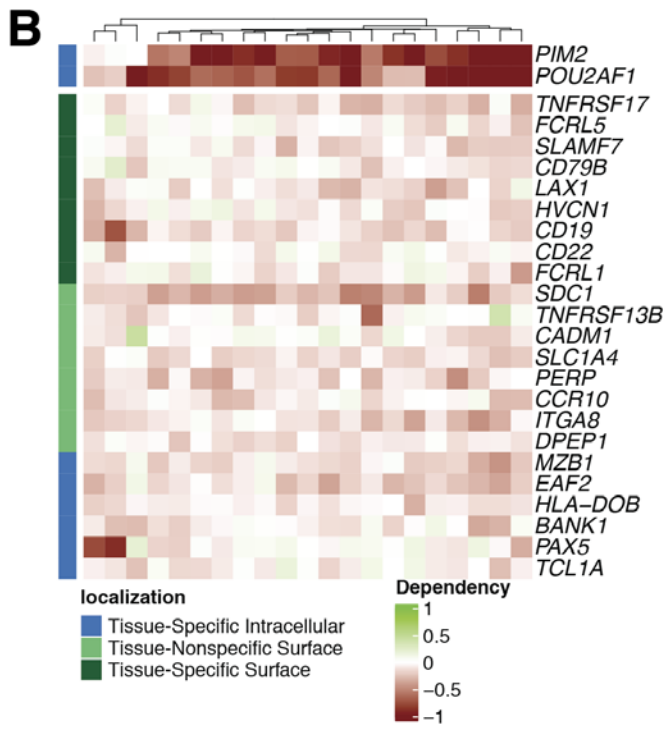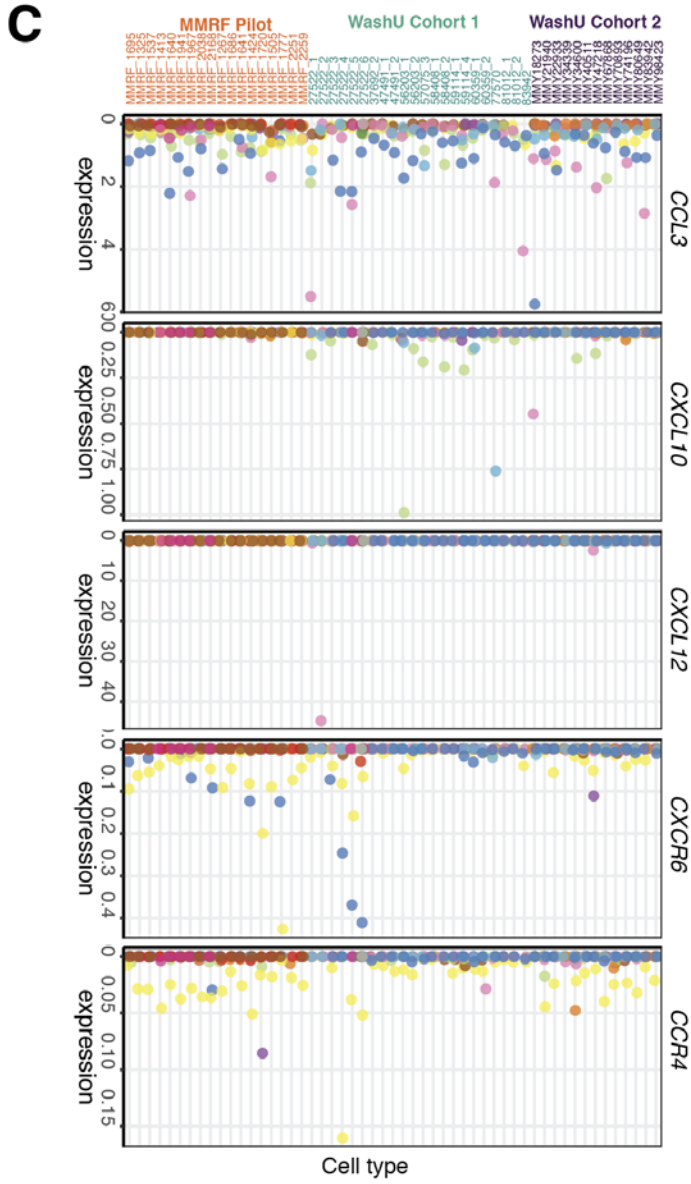

### **Figure S1. Related to Figure 2**

**A**, Gene ontology (GO) gene-set enrichment analysis of plasma and B-cell marker genes. GO terms from “Biological Function”. level 3 with enrichment FDR (q) <0.05 are shown for individual genes. Bubble size indicates fold change (ln) of plasma and B-cell expression relative to that of other BM cells; color indicates predicted cellular localization of gene products. **B**, Heatmap showing DepMap dependency scores, as assessed by CRISPR-Cas9 knockout, of myeloma markers across 21 plasma cell lines. As described by DepMap, a score of 0 indicates a non-essential gene, and -1 is the median dependency score of common essential genes. **C**, Bubble plots showing the normalized expression of chemokine and chemokine receptors, averaged by sample and cell type. Column corresponds to samples, colored by cohorts.

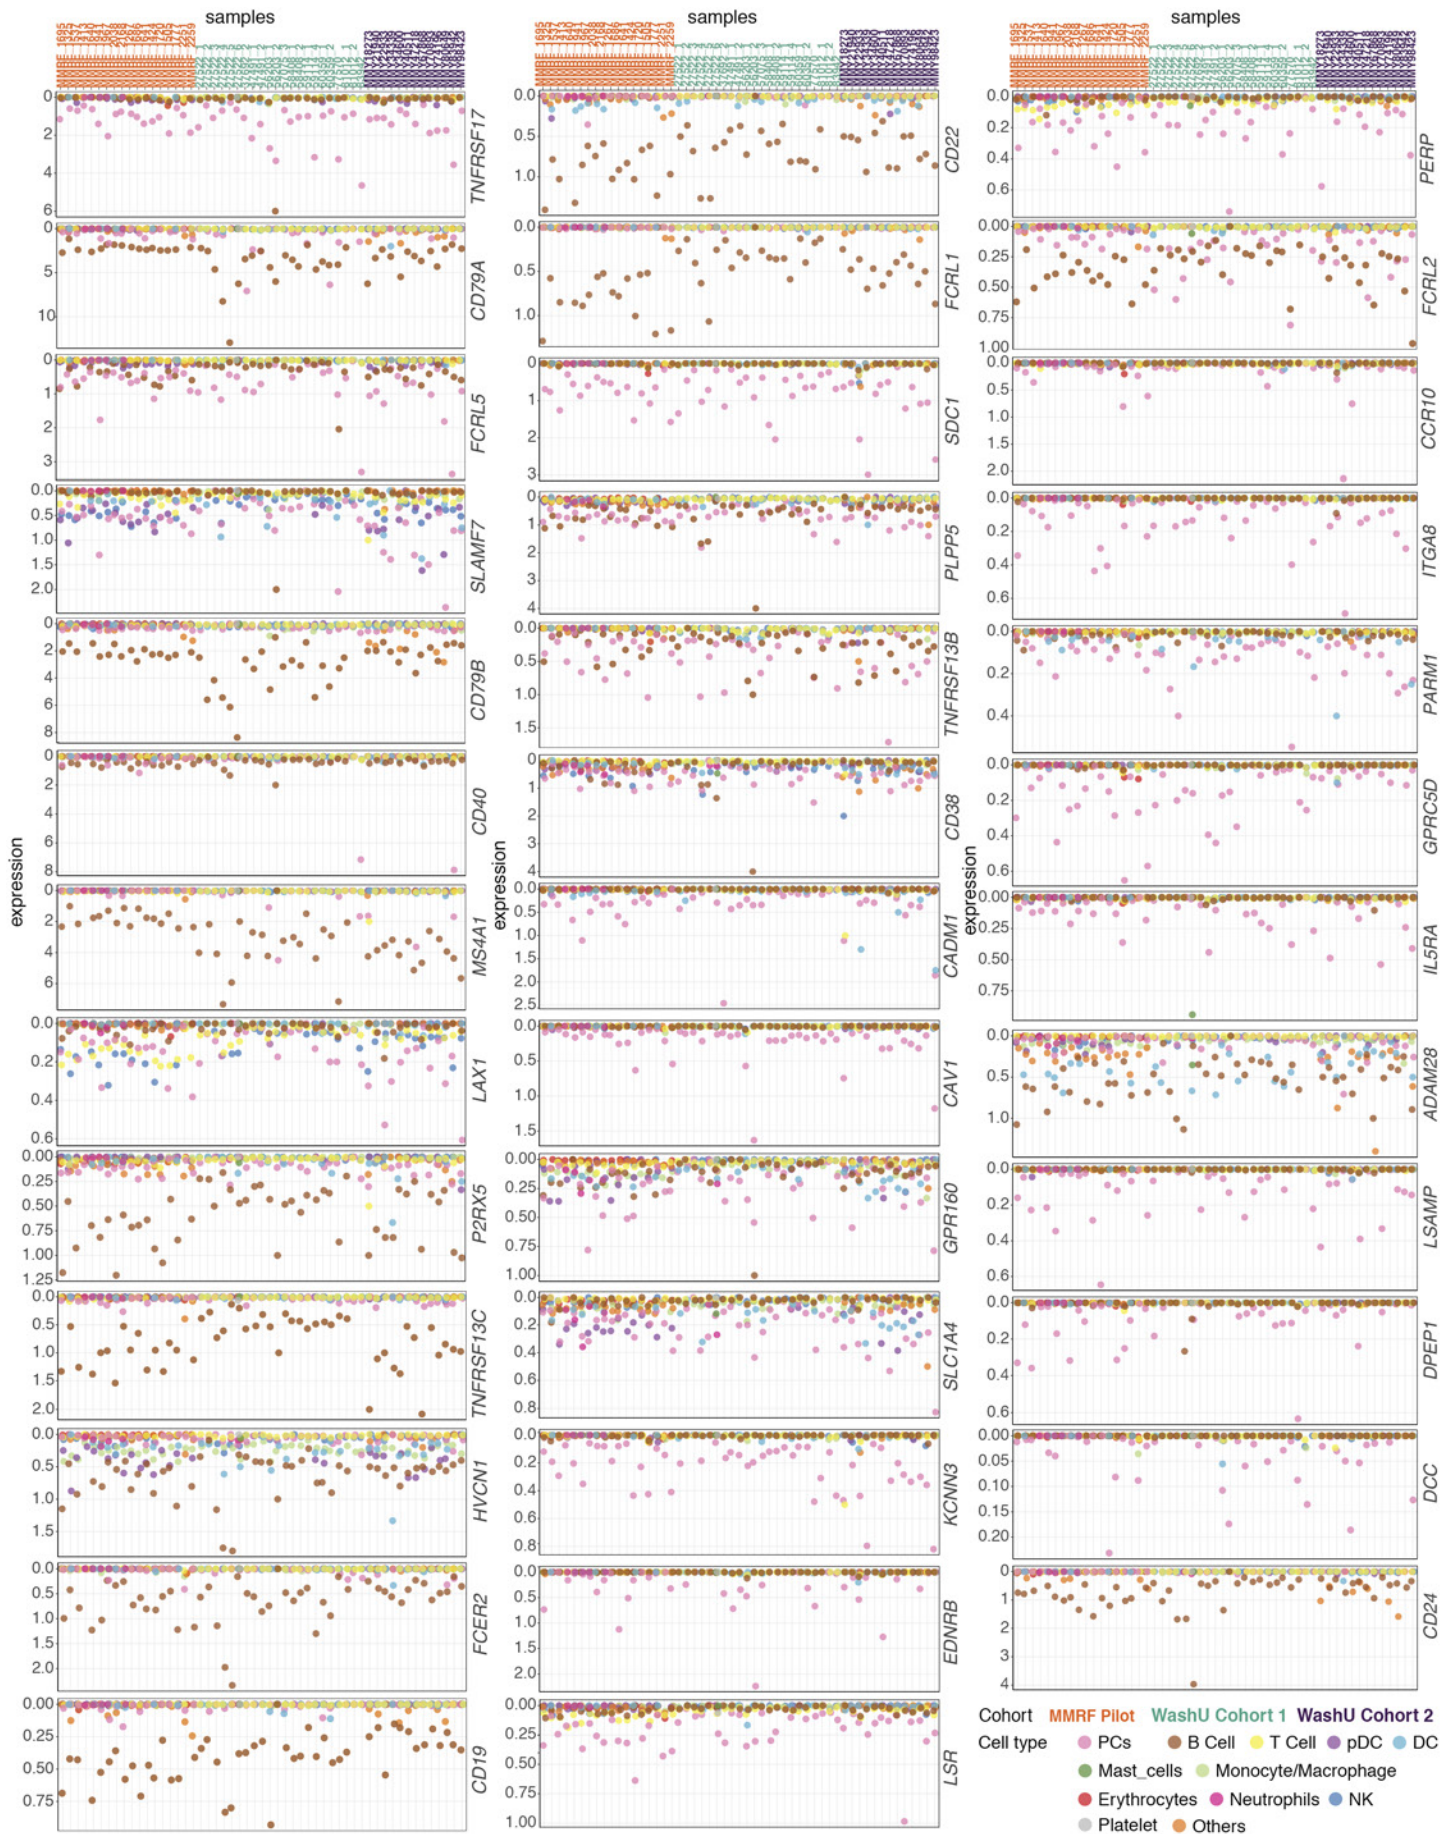

**Figure S2. Related to Figure 3**

Bubble plots showing the normalized expression of target candidates, averaged by sample and cell type. Column corresponds to samples, colored by cohorts. All genes are annotated as having cell surface expression.

**Percentage of target positive cells**

**Mean Fluorescence Intensity (MFI) of targets**

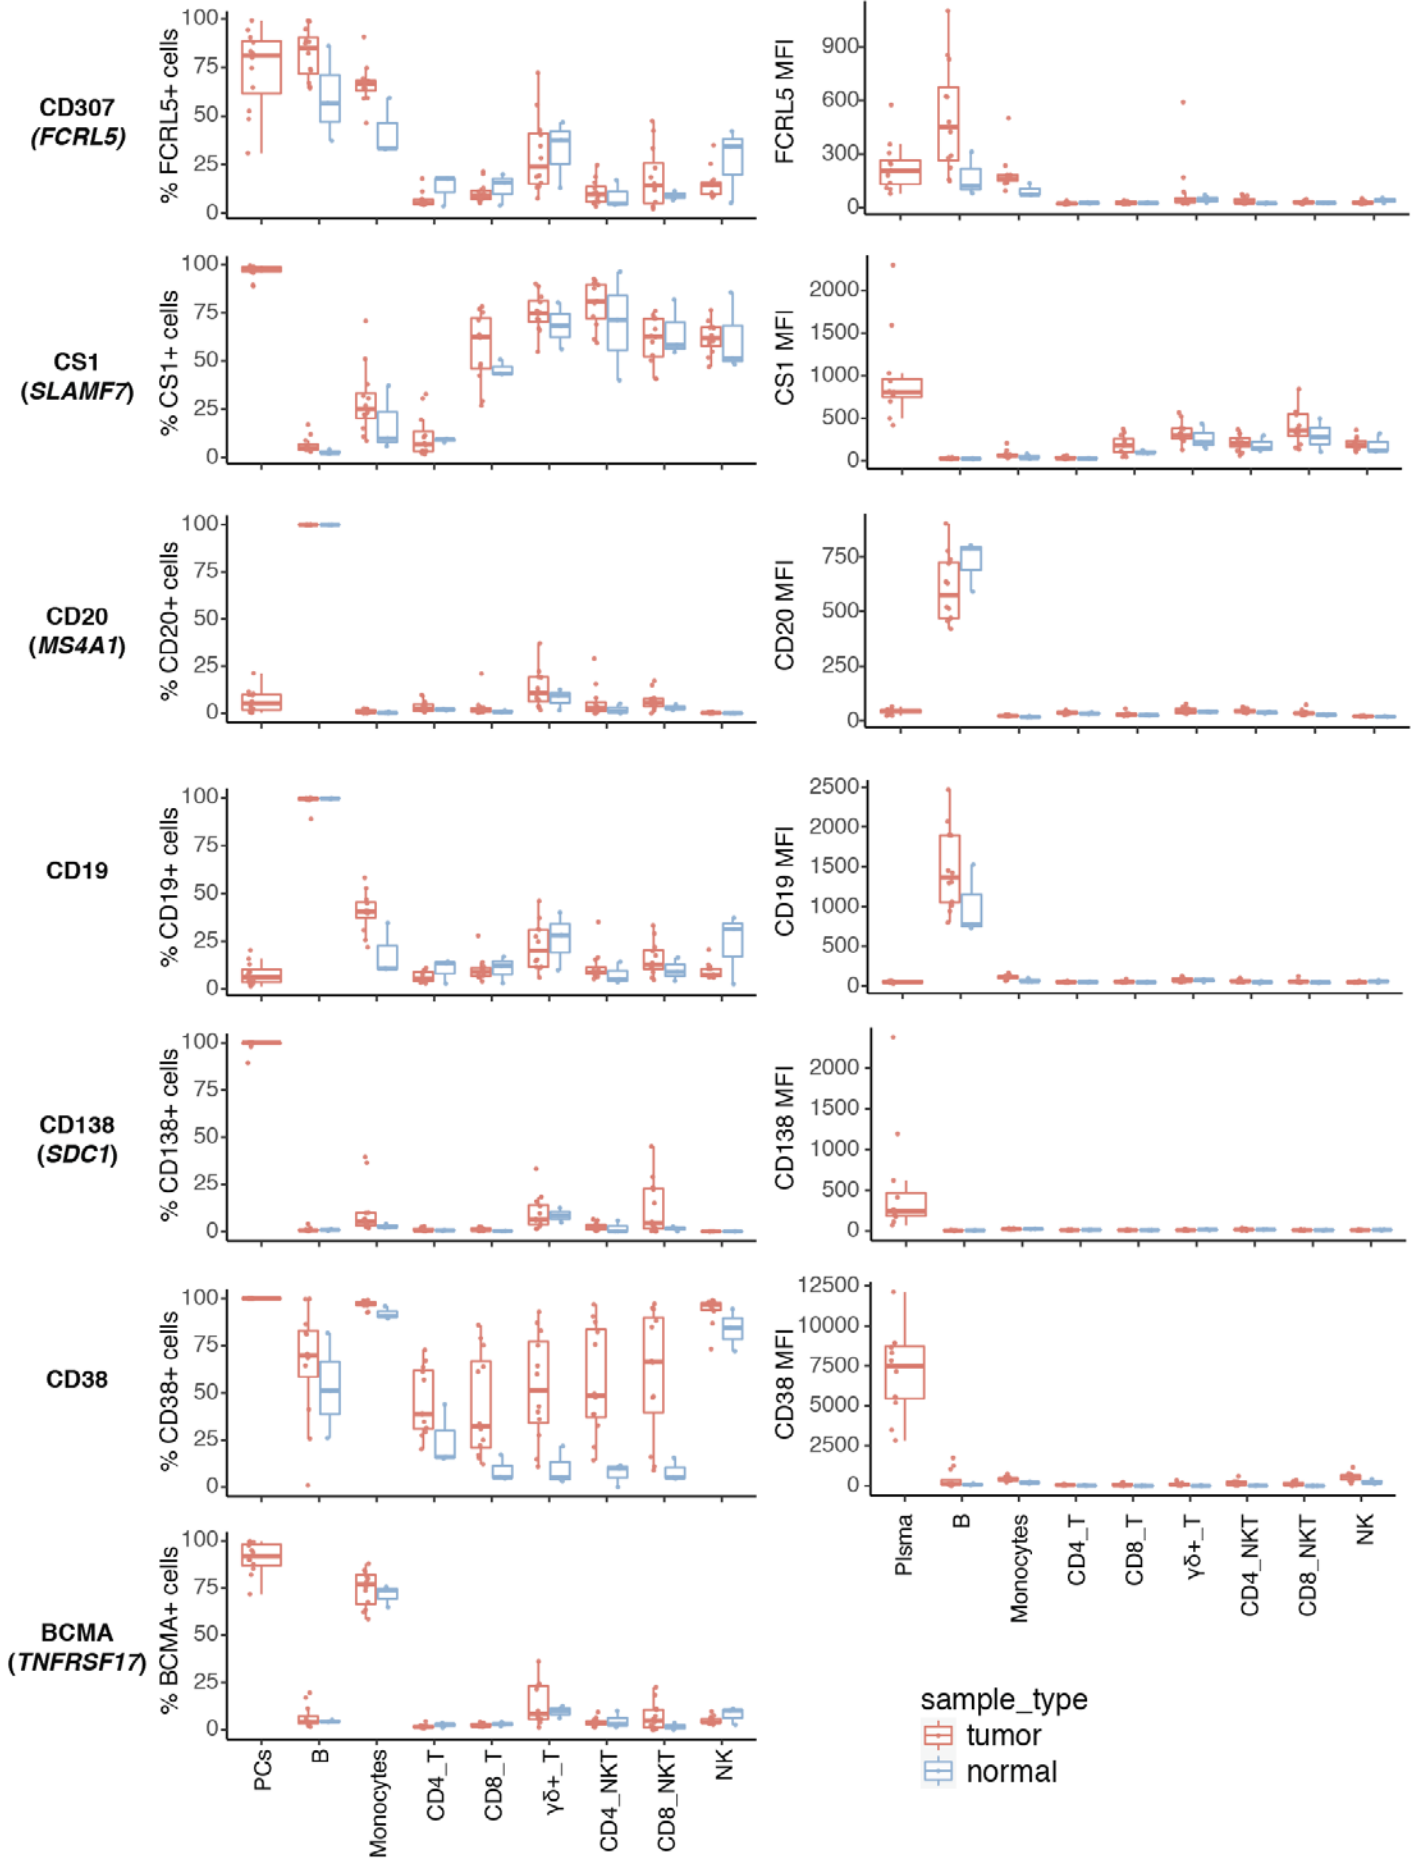

**Figure S3. Related to Figure 3**

Box plots showing percentage of target positive cells (left) and MFI of targets (right) in MM BMMC or PBMC from healthy donors across cell populations in flow cytometry. Viable cell populations were gated on the following: CD45<sup>lo</sup>CD319<sup>+</sup>CD38<sup>+</sup>CD138<sup>+</sup> PCs; CD45<sup>+</sup>CD20<sup>+</sup>CD19<sup>+</sup> B cells; CD45<sup>+</sup>CD14<sup>+</sup>CD33<sup>+</sup> Monocytes; CD45<sup>+</sup>CD3<sup>+</sup> T cells; CD45<sup>+</sup>CD3<sup>+</sup>gdTCR<sup>+</sup> gdT; CD45<sup>+</sup>CD56<sup>+</sup>CD3<sup>+</sup> NKTs; CD45<sup>+</sup>CD56<sup>+</sup>CD3<sup>-</sup> NK cells. Plasma cells were not detected in sufficient quantity for comparison in healthy donor PBMCs.

**A**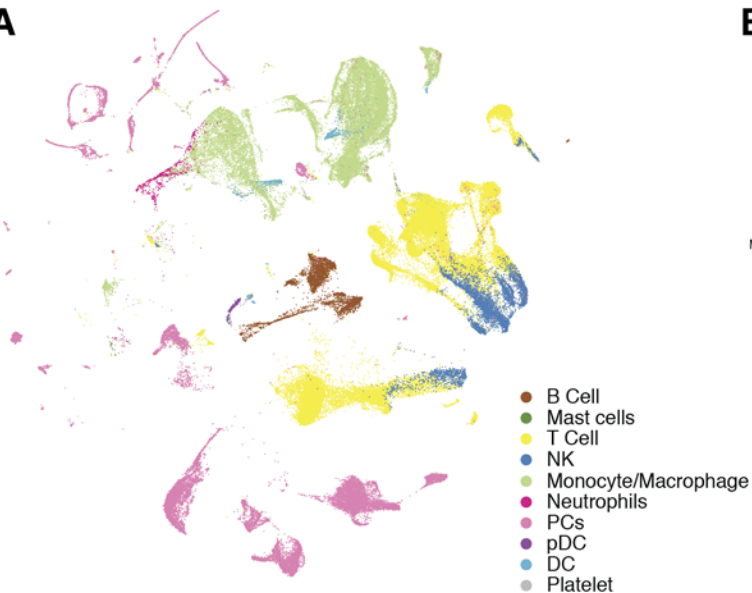**B**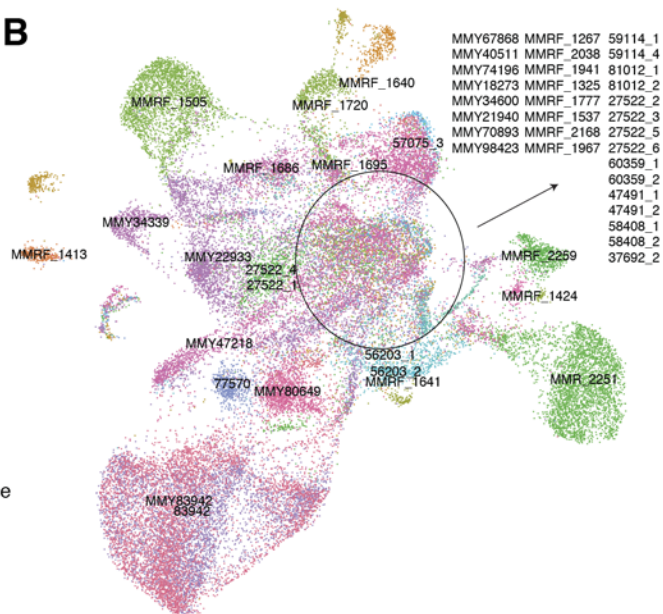**C**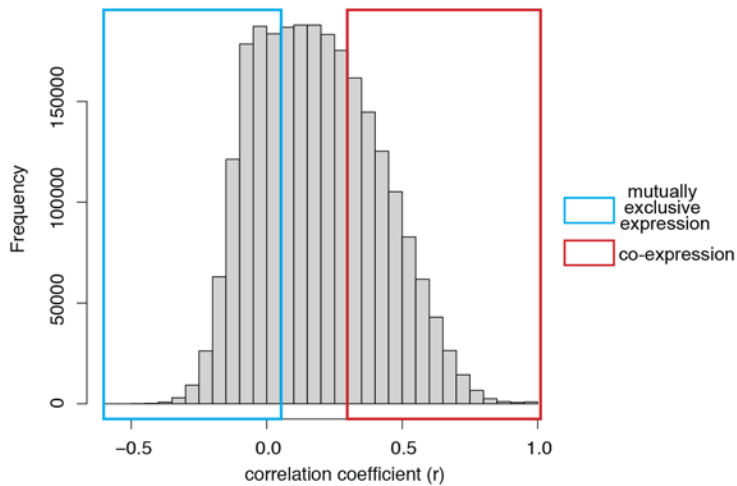**D**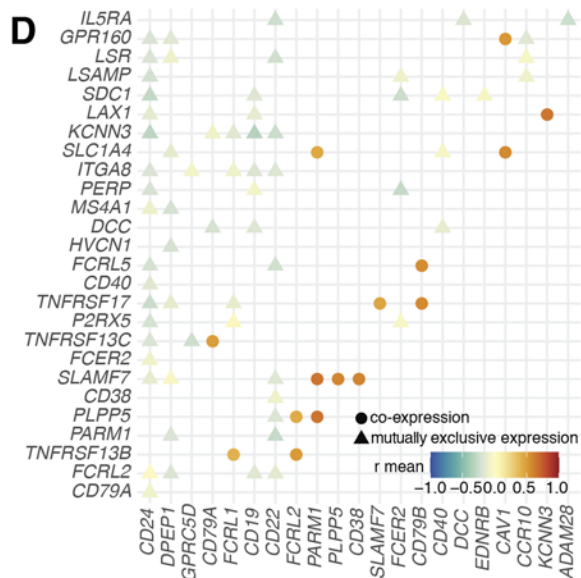**E**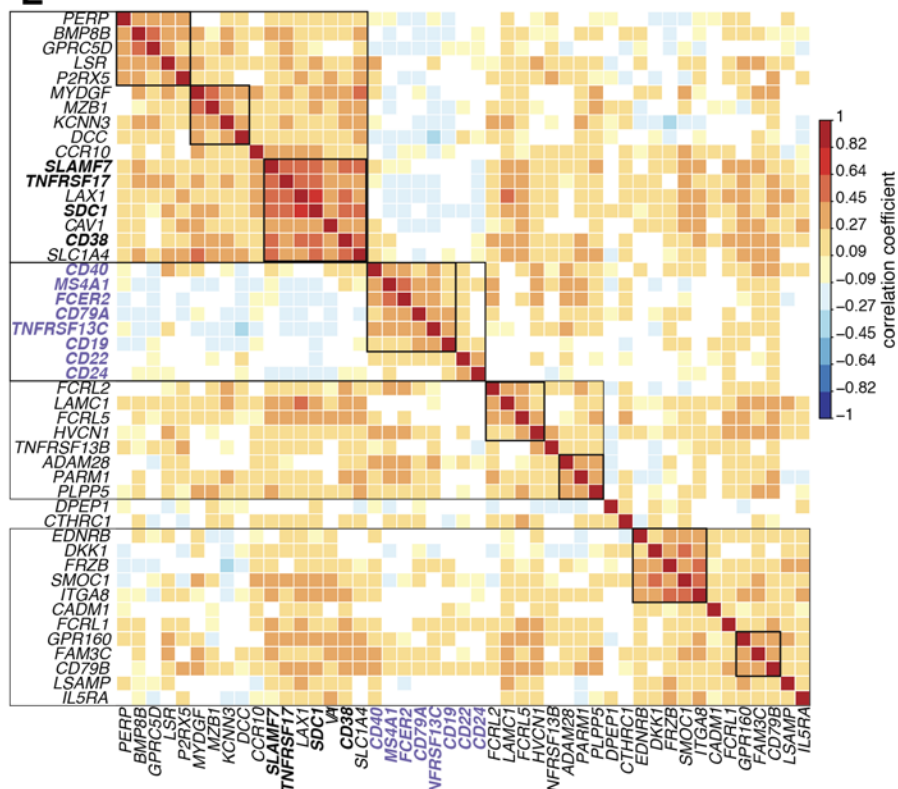

**Figure S4. Related to Figure 4**

**A**, UMAP showing all cells from 53 samples, colored by cell type. Compared to immune populations, plasma populations formed much more dispersed clusters, indicating the transcriptomic heterogeneity of tumor cells across patients. **B**, UMAP showing plasma cells from 53 patients, clustered by candidate targets, colored by samples. Most samples are clustered around the center while some samples form their individual clusters. **C**, Distribution of correlation coefficient of 2000 random genes and candidate targets. Red box shows the cutoff of identification of co-expressions and the blue box shows the cutoff of identification of mutually exclusive expressions. **D**, Co-expressed or mutually exclusively expressed gene pairs found in all three cohorts. Gene pairs with  $0.05 < r < 0.3$  were not shown. **E**, Pearson correlation heatmap of CoMMpass study bulk RNA-seq expression values. Gene groups with prominent positive correlation are boxed. Notable gene group containing canonical tumor markers have bolded names; a second group containing B-cell markers is labeled in purple.



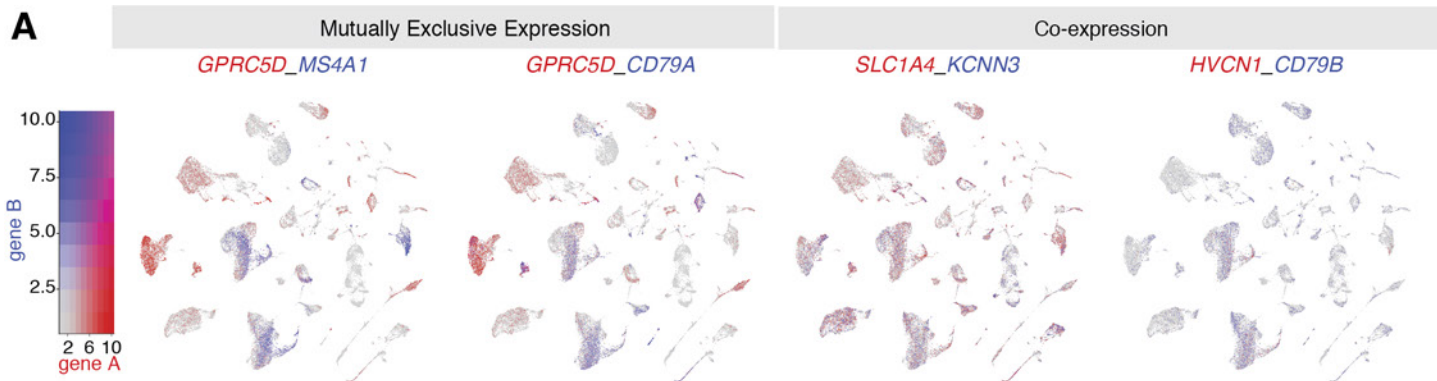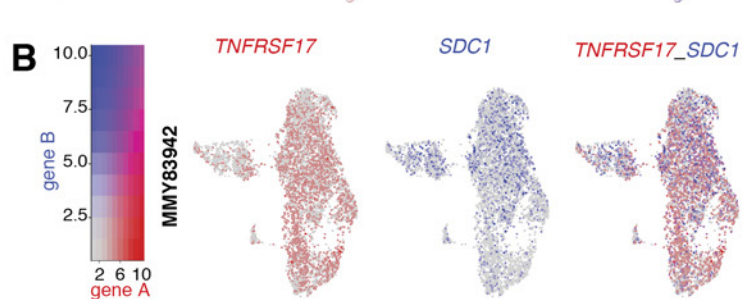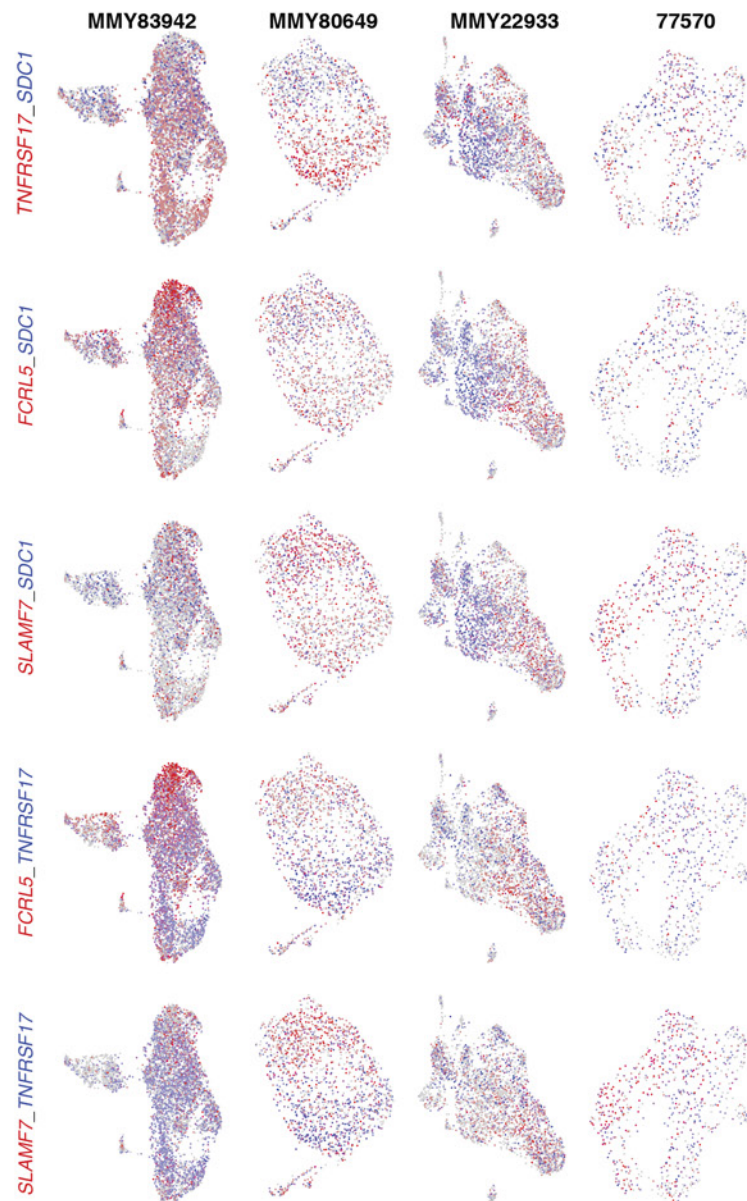

**C**      ← co-expression      ▲ only express gene A      ■ only express gene B

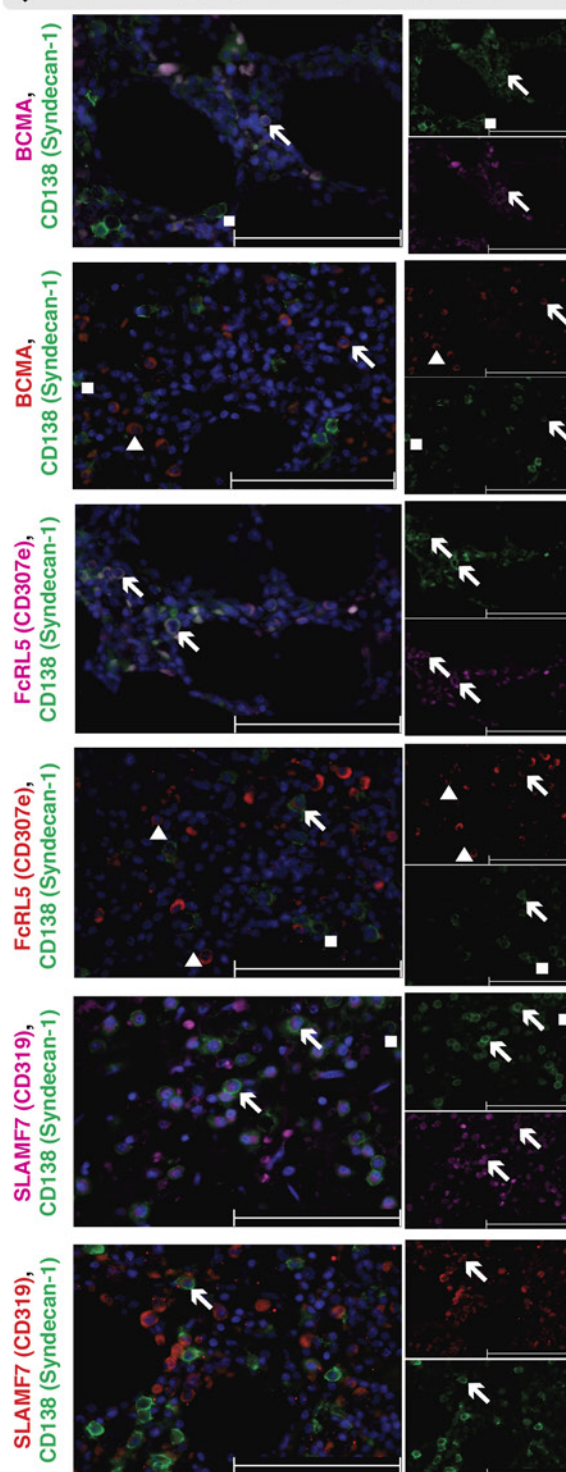

**Figure S5. Related to Figure 4**

**A**, In addition to Fig. 4C, more examples of gene pairs showing mutually exclusive expressions (left two) or co-expressions (right two). **B**, UMAPs of PCs from 4 patients colored by dual expression of gene pairs. **C**, Representative immunofluorescence (IF) co-staining of target pairs in bone marrow biopsies from patient s10-10686; 63x magnification; scale bar 100 $\mu$ m. Three channel overlay (Hoescht staining of nuclei in blue) enlarged, single channel violet/red and green images shown on right.

**A**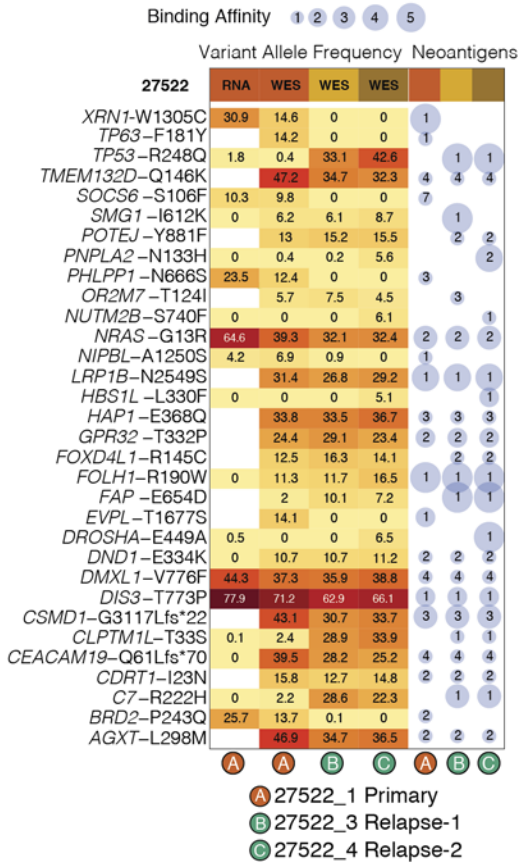**B**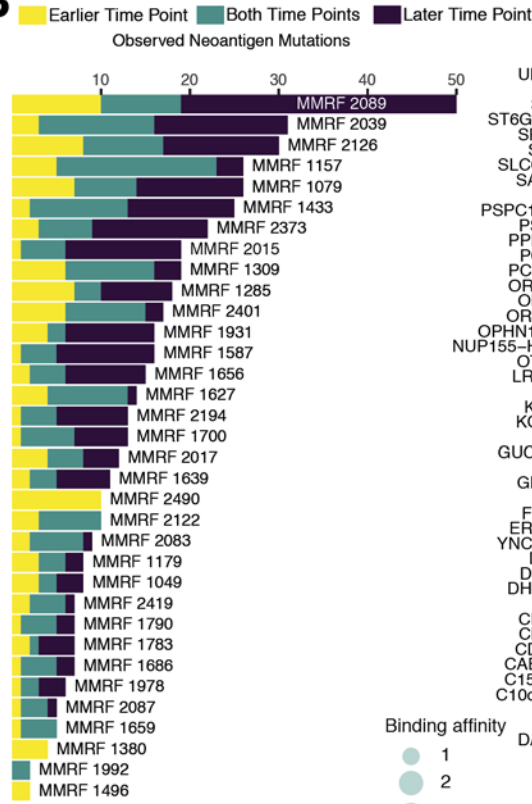**C**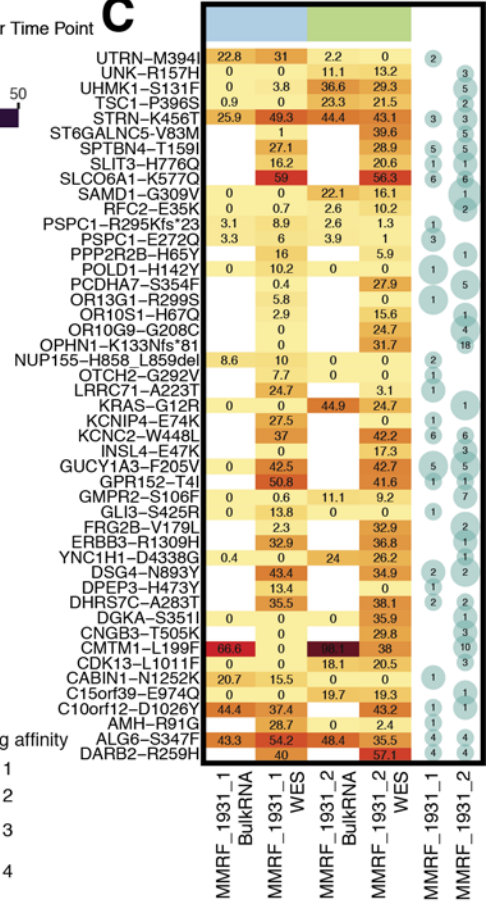

**Figure S6. Related to Figure 6**

**A**, Variant allele frequency (VAF) and expression pattern of neoantigens from patient 27522 across three time points. **B**, Expressed immunogenic peptides across timepoints along with disease progression. WES, Whole Exome sequencing. **C**, Predicted neoantigens for MMRF 1931 and the associated RNA and WES VAF from two time points.

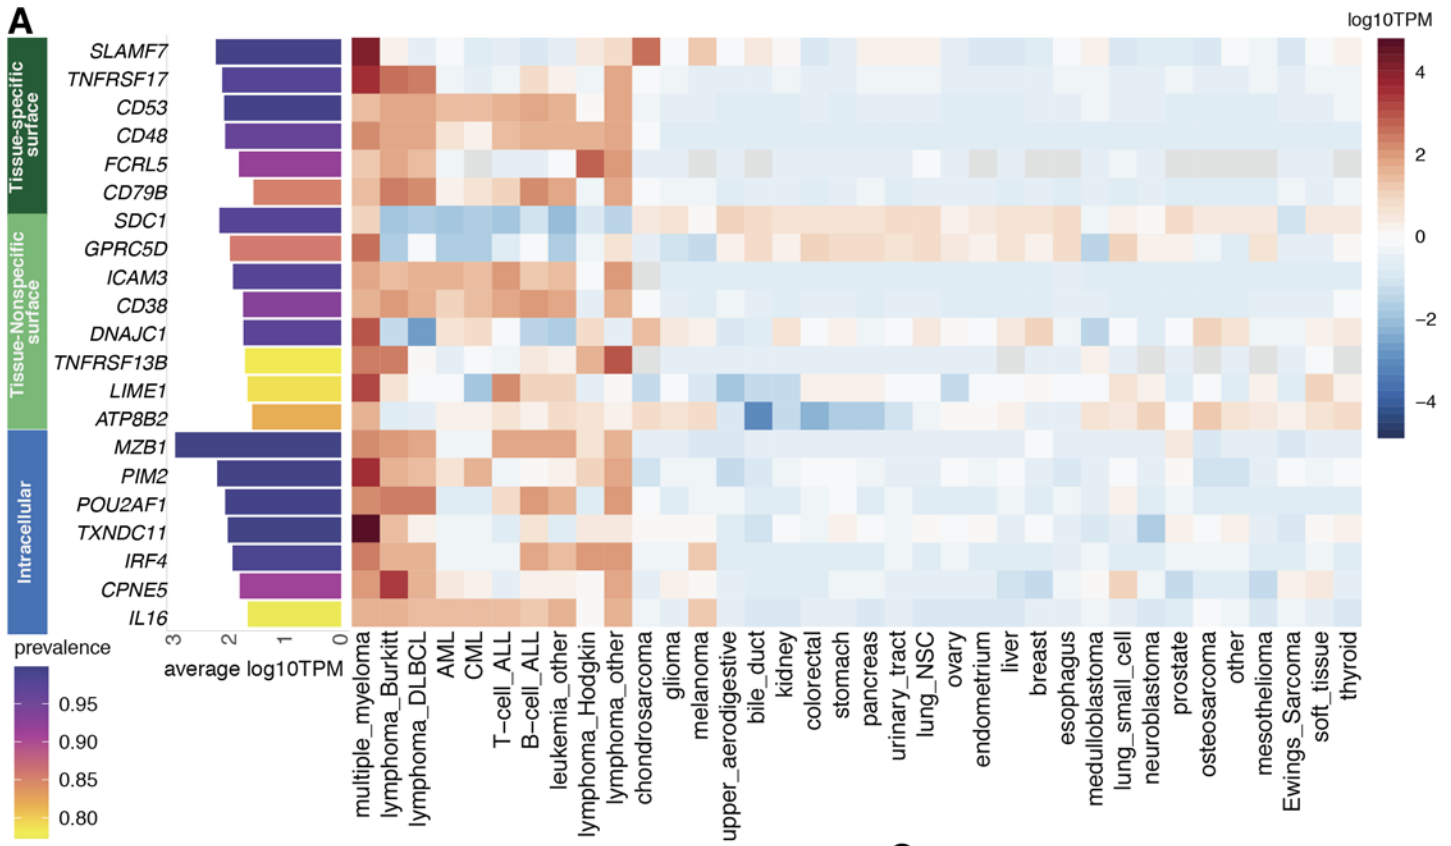

**B** mRNA expression of *TXNDC11* in malignant cell lines

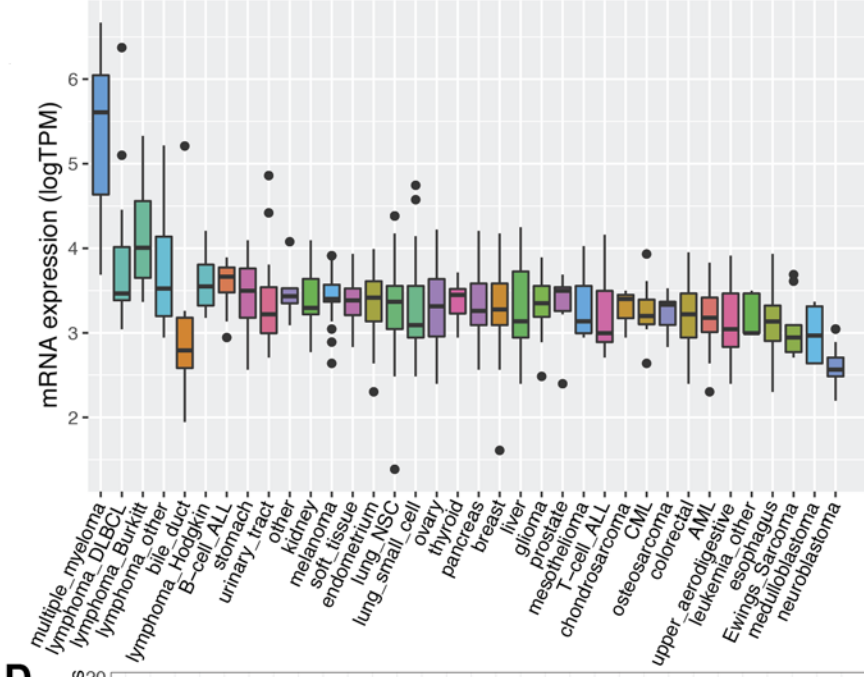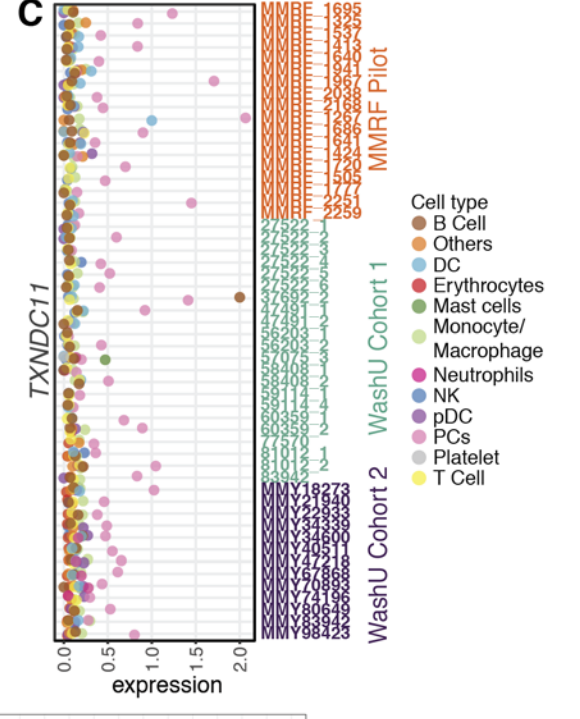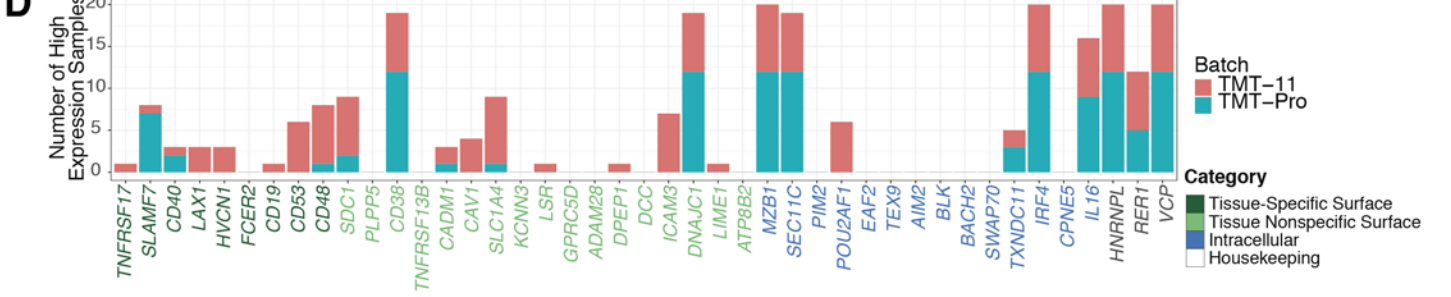

**Figure S7. Related to Figure 7**

**A**, Bar chart showing average expression of candidate markers in CD138+ sorted MM BM samples in the MMRF CoMMpass study. Color of bars indicates the proportion of samples having genes with expression above 95 percentile across all genes. Heatmap showing averaged mRNA expression of candidate markers across all profiled cell lines for each tissue type (n=1061; CCLE accessed March 23rd, 2021). DLBCL, diffuse large B cell lymphoma; AML, acute myeloid leukemia; CML, chronic myeloid leukemia; ALL, acute lymphoblastic leukemia; NSC, non-small cell. **B**, mRNA expression of TXNDC11 in malignant cell lines in CCLE. **C**, Bubble plot showing the normalized expression of TXNDC11 averaged by sample and cell type. Row corresponds to samples, colored by cohorts. **D**, Bar plot showing number of samples in which target protein expression surpasses the detected global median in that sample. Bars are colored by batch chemistry.
